# Supplementary figures and images for: Integrating computational and experimental chemical biology revealed variable anticancer activities of phosphodiesterase isoenzyme 5 inhibitors (PDE5i) in lung cancer
Source: Royal Society of Chemistry journal article supplement (doi:10.1039/d4md00364k), 2024-01-01

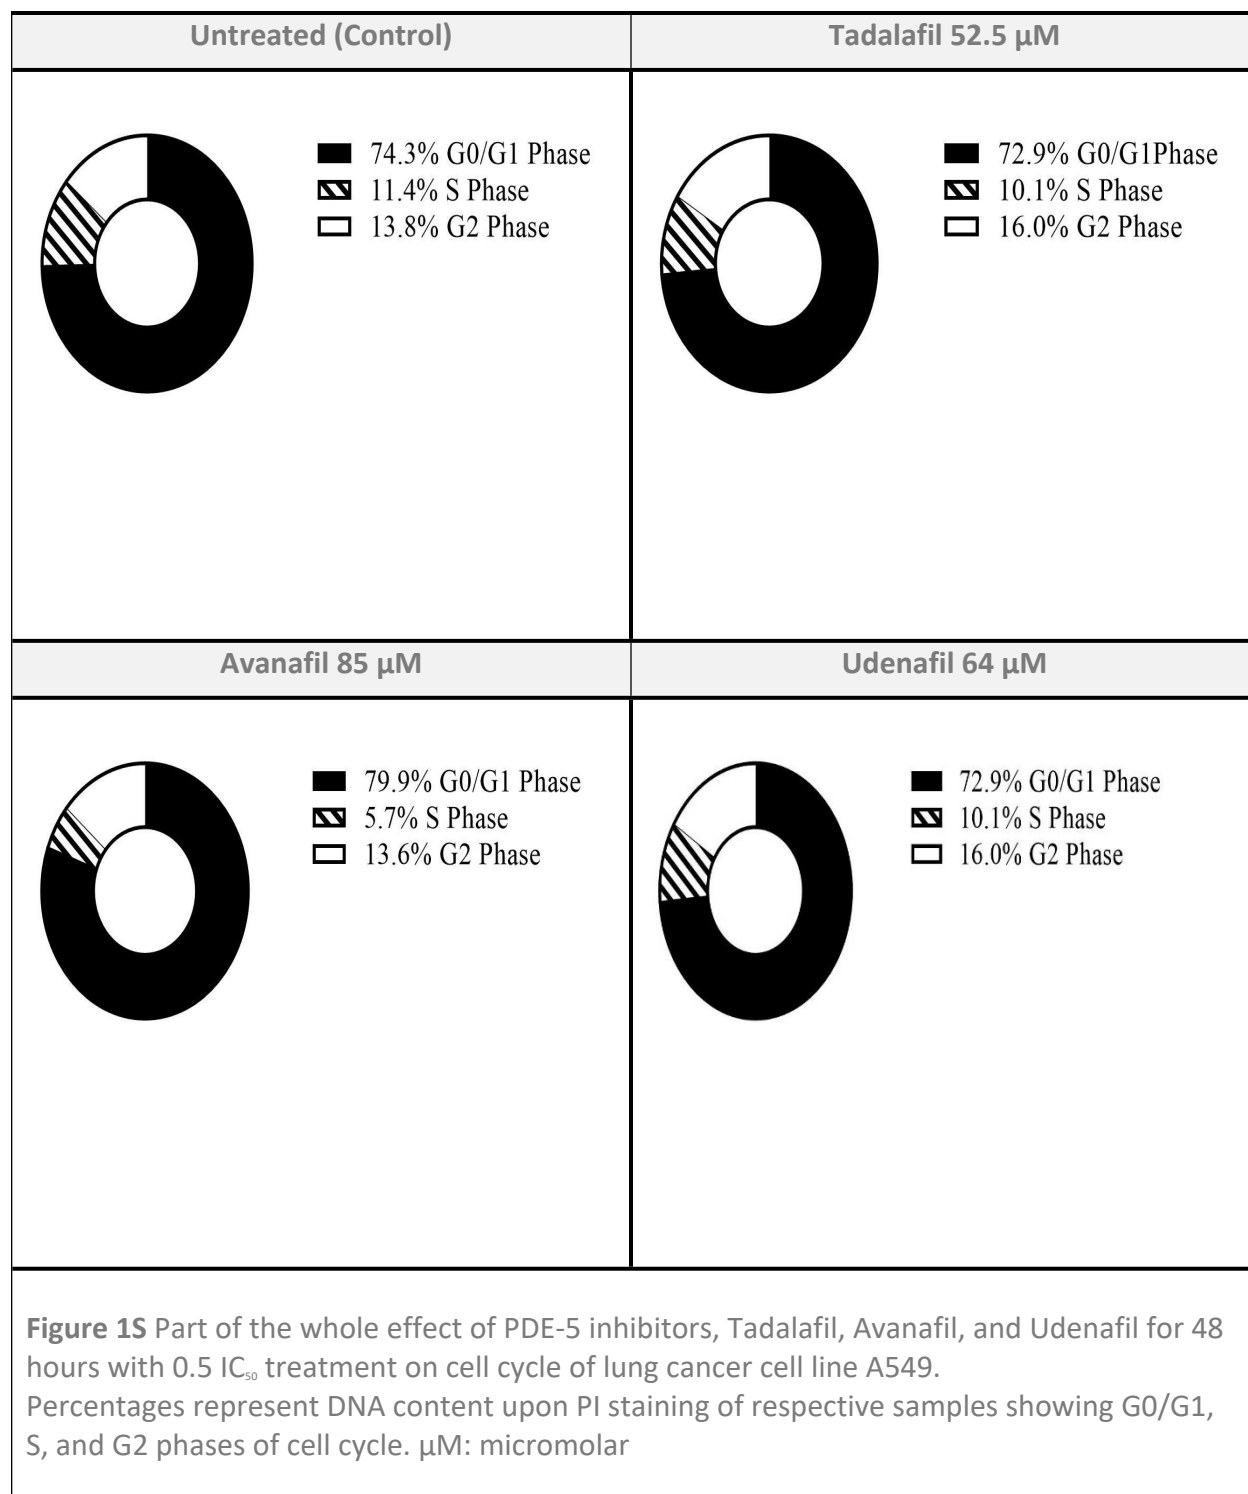

Supplement: d4md00364k1.pdf [file d4md00364k1.pdf]
